# Supplementary material for: Large-angle Lorentz Four-dimensional scanning transmission electron microscopy for simultaneous local magnetization, strain and structure mapping
Source: PubMed Central journal article supplement (PMC11790882; doi:10.1038/s41467-025-56521-6), 2025-02-03
Supplement: 41467_2025_56521_MOESM2_ESM.pdf [file 41467_2025_56521_MOESM2_ESM.pdf]

## **Description of Additional Supplementary Files**

Supplementary Movie 1 - in-situ magnetization video of a plastically deformed amorphous metallic alloy by activating the objective lens

Supplementary Movie 2 - in-situ magnetization video of undeformed amorphous metallic alloy by activating the objective lens
